# Supplementary material
Source: HighWire-hosted journal article supplement (https://qualitysafety.bmj.com/content/bmjqs-2022-015876)
Supplement: inline-supplementary-material-1 [file inline-supplementary-material-1.pdf]

## APPENDIX 1

### Diagnostic Error Evaluation and Research Taxonomy, by Schiff et al. (2009)

| Where?                   | What?                                                        |
|--------------------------|--------------------------------------------------------------|
| 1. Access/Presentation   | 1A Failure/delay in presentation                             |
|                          | 1B Failure/denied care access                                |
| 2. History               | 2A Failure/delay in eliciting critical piece of history data |
|                          | 2B Inaccurate/misinterpretation                              |
|                          | 2C Failure in weighing                                       |
|                          | 2D Failure/delay to follow-up                                |
| 3. Physical exam         | 3A Failure/delay in eliciting critical physical exam finding |
|                          | 3B Inaccurate/misinterpretation                              |
|                          | 3C Failure in weighing                                       |
|                          | 3D Failure/delay to follow-up                                |
| 4. Tests (lab/radiology) | 4A Failure/delay in ordering needed test(s)                  |
|                          | 4B Failure/delay in performing ordered test(s)               |
|                          | 4C Error in test sequencing                                  |
|                          | 4D Ordering of wrong test(s)                                 |
|                          | 4E Test ordered wrong way                                    |
|                          | 4F Sample mix-up/mislabeled (e.g. wrong patient)             |
|                          | 4G Technical errors/poor processing of specimen/test         |
|                          | 4H Erroneous lab/radiology reading of test                   |
|                          | 4I Failure/delayed reporting of result to clinician          |
|                          | 4J Failure/delayed follow up of (abnormal) test result       |
|                          | 4K Error in clinician interpretation of test                 |
| 5. Assessment            | 5A Failure/delay in considering the diagnosis                |
|                          | 5B Too little consideration/weight given to the diagnosis    |
|                          | 5C Too much weight on competing/coexisting diagnosis         |
|                          | 5D Failure/delay to recognize/weigh urgency                  |
|                          | 5E Failure/delay to recognize/weigh complication(s)          |
| 6. Referral/Consultation | 6A Failure/delay in ordering referral                        |
|                          | 6B Failure/delay in obtaining/scheduling ordered referral    |
|                          | 6C Error in diagnostic consultation performance              |
|                          | 6D Failure/delayed communication/follow-up of consultation   |
| 7. Follow-up             | 7A Failure to refer patient to close/safe setting/monitoring |
|                          | 7B Failure/delay in timely follow-up/rechecking of patient   |
